# Supplementary material for: A short deletion in the DNA-binding domain of STAT3 suppresses growth and progression of colon cancer cells
Source: publisher site journal article supplement (doi:10.18632/aging.202439), 2021-02-01
Supplement: Supplementary file [file aging-v13i4-202439-supplementary-material-SD1.pdf]

## SUPPLEMENTARY TABLES

**Supplementary Table 1. All the primers used in this study were listed in this table.**

| Symbol                                 | Sequence                                   | T <sub>m</sub> (° C) |
|----------------------------------------|--------------------------------------------|----------------------|
| STAT3 for identification and detection | TCAGGTTGCTGGTCA<br>GGTCAGCATGTTGTACC       | 56                   |
| Snail for ChIP-assay                   | TCGGCAGCTGAACCGA<br>GCCGATTACCGTGCAG       | 60                   |
| Spg20 for ChIP-assay                   | GCCGATTTGACCGAG<br>CGTCCGTGAATTGACC        | 58                   |
| Mmp3 for ChIP-assay                    | GGCCTCGGCGCAGCCGA<br>GACCGAGCGCTGCAG       | 58                   |
| HNRNPAB for ChIP-assay                 | TGGCCGAGAGGACGG<br>GGGTTACACCTTCGAA        | 62                   |
| SDE2 for ChIP-assay                    | AATGCGGCTAGCAGGCC<br>GAGGCCCGGAGCCAATGG    | 54                   |
| STEAP1 for ChIP-assay                  | GAGCCGTTGCAGCTG<br>GAGACGTGCACATGG         | 60                   |
| TARDBP for ChIP-assay                  | TTTCTTATCTTTGGCCA<br>GGATTTCGTTACGTT       | 58                   |
| SYNJ2 for ChIP-assay                   | TTGTGCAGTACCCAGGTG<br>TAGTTATCCGATTGA      | 56                   |
| IL12RB2 for ChIP-assay                 | ATGCTGTGCACACACT<br>CATTGCTGATCACACA       | 58                   |
| IFNA13 for ChIP-assay                  | ACATGCTGTGGCACAGGC<br>GGGGTGC GGCTAACCGGTT | 60                   |
| IL17D for ChIP-assay                   | TTGGTTACCCAAAC<br>CAACACACTTGTGCAC         | 60                   |
| CCND2 for ChIP-assay                   | CACACTGTTGGTTTTTACA<br>CACCGGCTCCTTCCGACC  | 58                   |
| SOCS6 for ChIP-assay                   | CCACTTGGCACCACA<br>TTGGTTCACACGTG          | 60                   |
| HNRNPAB for qPCR                       | TTGGTGCTGATGTGTGAC<br>GATGACACGTGAGATG     | 60                   |
| SDE2 for qPCR                          | GATGATGGAGTGGG<br>GGTGTGTCCTGCTACA         | 58                   |
| STEAP1 for qPCR                        | CCAATCCTGGTCAT<br>GAGACACATAAATCTC         | 58                   |
| TARDBP for qPCR                        | TATCTACTTGGCTATCAGA<br>CACGTGAGTGGACCAC    | 56                   |
| SYNJ2 for qPCR                         | TGATGGCCACAGTG<br>CACAGGGGGTGCATGAAGTT     | 56                   |
| IL12RB2 for qPCR                       | CAAATTGGTAGCTGACA<br>ATTGGACAATTGGACATGA   | 55                   |
| IFNA13 for qPCR                        | CCAATCCTGGTCAT<br>GAGACACATAAATCTC         | 58                   |
| IL17D for qPCR                         | AACCTTTCATAGGGAC<br>GGAGCCACGGTGGAC        | 58                   |

|                |                                                  |    |
|----------------|--------------------------------------------------|----|
| CCND2 for qPCR | GGAGGACCCATCTACACGG<br>GAGGGCCATCTGGCACA         | 58 |
| SOCS6 for qPCR | GAGCAGGAGAGACAGT<br>GACCACACGGGACCCATT           | 56 |
| $\beta$ -actin | CAGGGCGTGATGGTGGGCA<br>CAAACATCATCTGGGTCATCTTCTC | 58 |

**Supplementary Table 2. The basic information of the sequencing data.**

| Sample              | MT1_Input  | MT2_Input  | MT1        | MT2        | WT1_Input  | WT2_Input  | WT1        | WT2        |
|---------------------|------------|------------|------------|------------|------------|------------|------------|------------|
| Total Raw Reads     | 20347878   | 21145236   | 20050877   | 20079109   | 20154533   | 21352412   | 20234033   | 21431912   |
| Total Raw Bases     | 1546438728 | 1607037936 | 1523866652 | 1526012284 | 1531744508 | 1622783312 | 1537786508 | 1628825312 |
| Total Clean Reads   | 20229383   | 21027590   | 19962725   | 19999408   | 20041558   | 21224271   | 20159353   | 21147387   |
| Total Clean Bases   | 1525944696 | 1586740803 | 1507071661 | 1510655073 | 1512346277 | 1600610000 | 1523162485 | 1585258639 |
| Mapped Reads        | 20008881   | 20798048   | 19550649   | 19583796   | 19822067   | 20991514   | 19453838   | 20407766   |
| Mapped Ratio        | 98.91%     | 98.91%     | 97.94%     | 97.92%     | 98.90%     | 98.90%     | 96.50%     | 96.50%     |
| Unique Mapped Reads | 15657282   | 16286655   | 15430889   | 15470657   | 15522511   | 16426580   | 15524317   | 16207577   |
| Unique Mapped Ratio | 77.40%     | 77.45%     | 77.30%     | 77.36%     | 77.45%     | 77.40%     | 77.01%     | 76.64%     |
